# Supplementary material for: Reliability and Time Course of Postexercise Hypotension during Exercise Training among Adults with Hypertension
Source: MDPI journal article supplement (doi:10.3390/jcdd11020042), 2024-01-29
Supplement: s1 [file s1]

**Table S1.** Results of Repeated Measures Models for the Continuous Blood Pressure and Binary Postexercise Hypotension Outcomes

| Model     | Variable         | Chisq   | Df | P-value | AIC       | ICC    |
|-----------|------------------|---------|----|---------|-----------|--------|
| RMANOVA   | Week             | 4.1685  | 11 | 0.9647  | 2248.5202 | 0.3076 |
|           | Week             | 13.7314 | 11 | 0.2482  |           |        |
| RMANCOVA  | Pre-exercise SBP | 49.6335 | 1  | 0.0000  | 2177.9031 | 0.5834 |
|           | Pre-exercise DBP | 3.6928  | 1  | 0.0547  |           |        |
| GRMANOVA  | Week             | 4.4145  | 11 | 0.9562  | 230.2550  | 0.3422 |
| GRMANCOVA | Week             | 5.1847  | 11 | 0.9219  | 224.9167  | 0.6361 |

**Note:** AIC = akaike information criterion, Chisq = chi square, Df = degrees of freedom, GRMANOVA = generalized repeated measures analysis of variance, GRMANCOVA = generalized repeated measures analysis of covariance, ICC = intraclass correlation coefficient, RMANOVA=repeated measures analysis of variance, RMANCOVA = repeated measures analysis of covariance
