# Supplementary material for: Reliability and Time Course of Postexercise Hypotension during Exercise Training among Adults with Hypertension
Source: J Cardiovasc Dev Dis. 2024 Jan 29;11(2):42. doi: 10.3390/jcdd11020042 (PMC10889392; doi:10.3390/jcdd11020042)
Supplement: Supplementary file 1 [file jcdd-11-00042-s001.zip]

Archive with 4 entries (4 files):
- Kiernan Supplemental Codes S1 12-27-23.pdf
- Kiernan Supplemental Formulas 1-24-24.pdf
- Kiernan Supplemental Graphs 12-27-23.pdf
- Kiernan Supplemental Table 12-27-23.pdf
