# Supplementary figures and images for: Reliability and Time Course of Postexercise Hypotension during Exercise Training among Adults with Hypertension
Source: MDPI journal article supplement (doi:10.3390/jcdd11020042), 2024-01-29

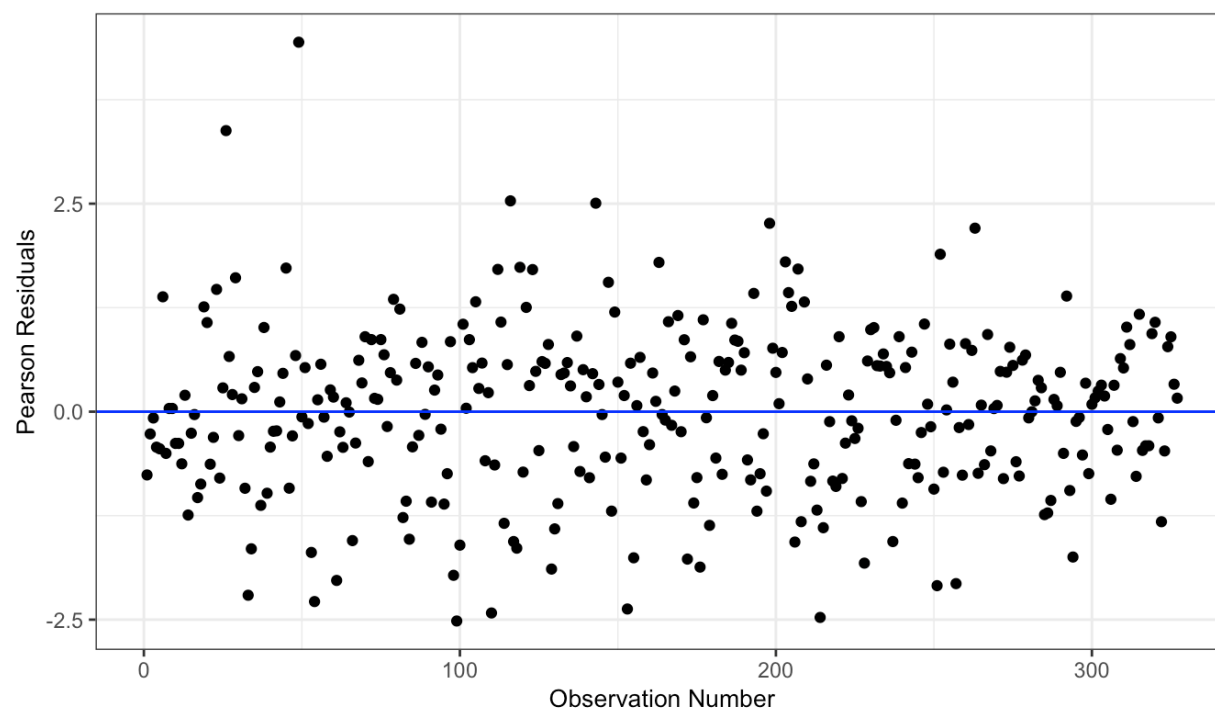

**Figure S1.** Plot of Residuals Under RMANCOVA

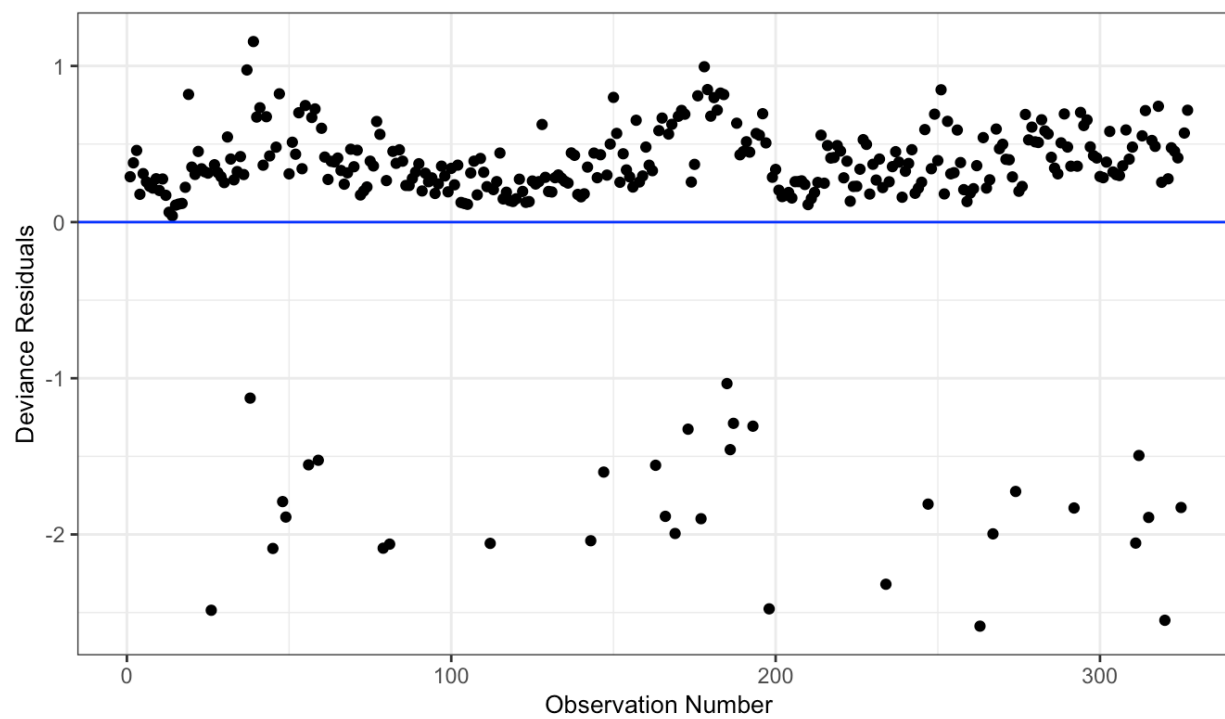

**Figure S2.** Plot of Residuals Under GRMANCOVA

Supplement: s1 [file s1]
